# Supplementary material for: Exogenous γ-Aminobutyric Acid (GABA) Enhanced Response to Abiotic Stress in Hypsizygus marmoreus by Improving Mycelial Growth and Antioxidant Capacity
Source: MDPI journal article supplement (doi:10.3390/metabo14020094), 2024-01-27
Supplement: s1 [file s1]

SUPPLEMENTARY MATERIAL

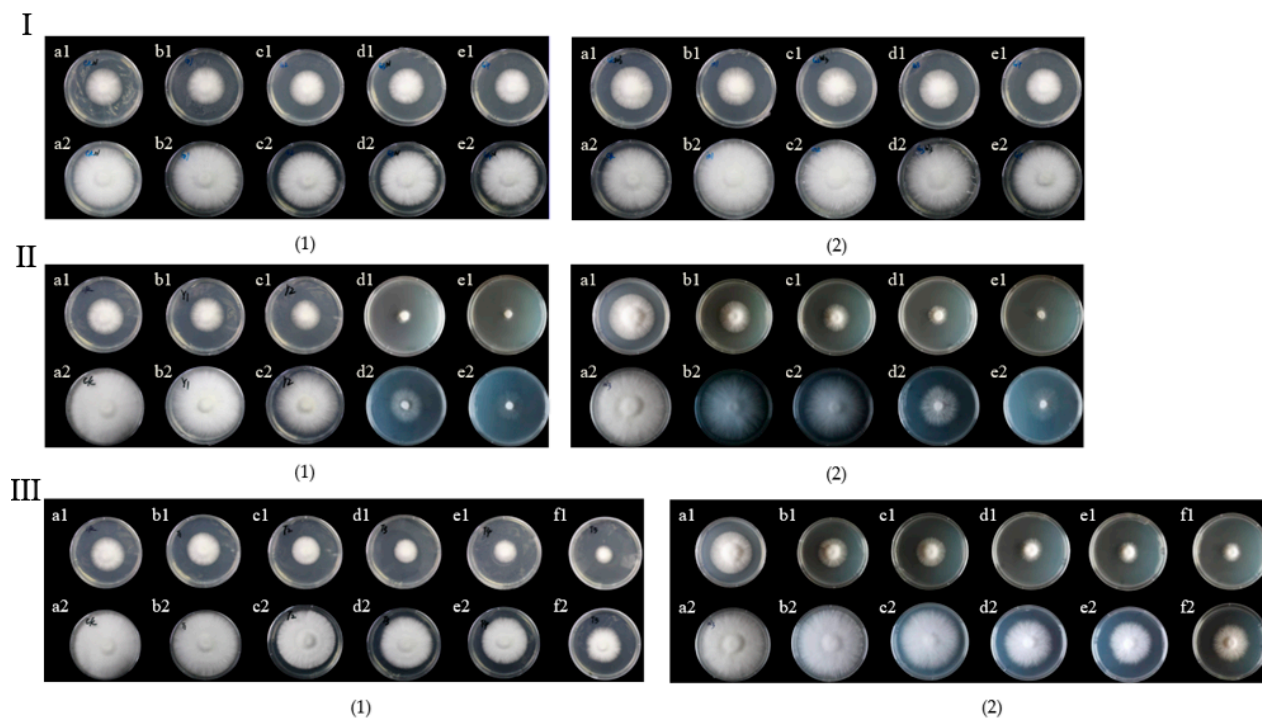

**Figure S1.** Effect of GABA on colony morphology of *H. marmoreus* upon addition of GABA(I), under salt stress (II) or under dehydration stress (III). (I) a1-e1 are photos of NN12 (1) and W3 (2) mycelial growth on the 7th day (medium was added with 0, 5, 10, 15, 20 mM GABA respectively), and a2-e2 are parallel photos on the 14 day; (II) a1-e1 are photos of NN12 (1) and W3 (2) mycelial growth on the 7th day (medium was added with 0, 50, 100, 150, 200, 400 mM NaCl respectively), and a2-e2 are parallel photos on the 14 day; (III) a1-e1 are photos of NN12 (1) and W3 (2) mycelial growth at the 7th day (medium was added with 0, 100, 200, 300, 400, 500 mM  $C_6H_{14}O_6$  respectively) and a2-e2 are parallel photos on the 14 day.

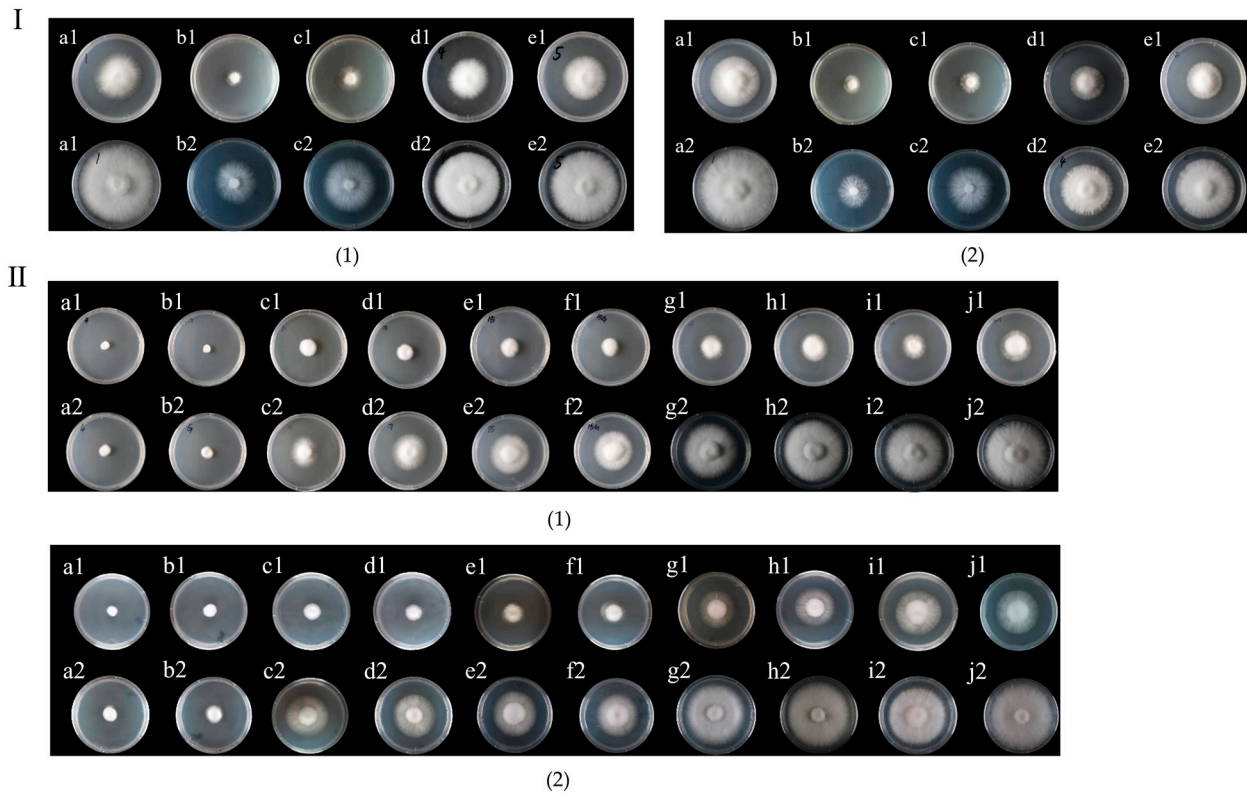

**Figure S2.** Effect of GABA on colony morphology under abiotic stress. (I): photos of NN12 (1) and W3 (2) mycelial growth in five groups taken on the 7th day (a1-e1) and on the 14th day (a2-e2): (a), 150 mM NaCl (b), 150 mM NaCl + 5 mM GABA (c), 300 mM C<sub>6</sub>H<sub>14</sub>O<sub>6</sub> (d) and 300 mM C<sub>6</sub>H<sub>14</sub>O<sub>6</sub> + 5 mM GABA (e); (II): photos of NN12 (1) and W3 (2) mycelial growth taken on the 7th day (a1-j1) and on the 14th day (a2-j2): a, c, e, g, i are photos of groups at 4°C, 10°C, 15°C, 20°C, and 23°C, without GABA addition; b, d, f, h, and j are photos of groups at 4°C, 10°C, 15°C, 20°C, and 23°C added with 5 mM GABA.

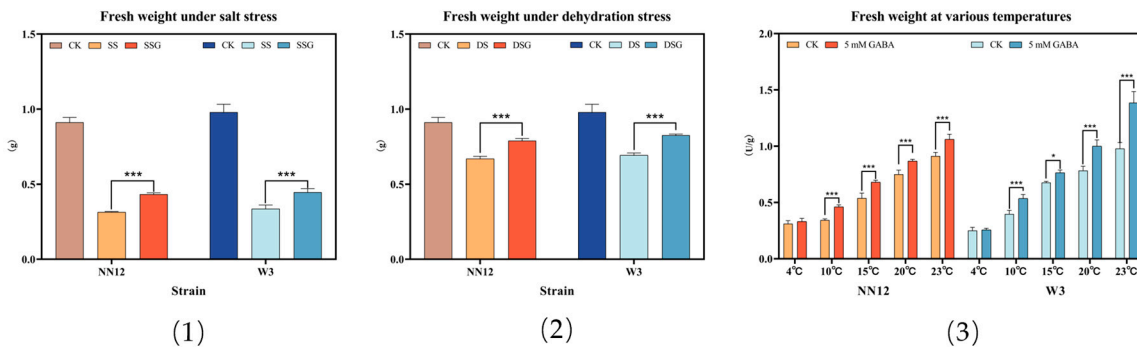

**Figure S3.** Effect of GABA on fresh weight of aerial mycelium under abiotic stress. (1) Fresh mycelium weight of NN12 and W3 under salt stress; (2) Fresh mycelium weight of NN12 and W3 under dehydration stress; (3) Fresh weight of NN12 and W3 mycelium at different temperatures. CK: control; SS: 150mM NaCl; SSG: 150mM NaCl + 5mM GABA; DS: 300mM C<sub>6</sub>H<sub>14</sub>O<sub>6</sub>; DSG: 300mM C<sub>6</sub>H<sub>14</sub>O<sub>6</sub>+5mM GABA.

**Table S1.** Mycelial tip diameter under salt stress and dehydration stress

| Treatment group                                                 | Mycelial tip diameter( $\mu$ m) |
|-----------------------------------------------------------------|---------------------------------|
| CK                                                              | 6.62 $\pm$ 0.14 <sup>a</sup>    |
| 150 mM NaCl                                                     | 4.55 $\pm$ 0.07 <sup>b</sup>    |
| 150 mM NaCl+5 mM GABA                                           | 3.72 $\pm$ 0.14 <sup>c</sup>    |
| 300 mM C <sub>6</sub> H <sub>14</sub> O <sub>6</sub>            | 5.59 $\pm$ 0.08 <sup>d</sup>    |
| 300 mM C <sub>6</sub> H <sub>14</sub> O <sub>6</sub> +5 mM GABA | 5.27 $\pm$ 0.15 <sup>e</sup>    |

Data are presented as means $\pm$ SD(n=10); Different lowercase letters indicate significant differences in mycelial tip diameter (p<0.01)
